# Supplementary material
Source: PubMed Central journal article supplement (PMC8105003)
Supplement: AEM.02546-20-s0001.pdf [file AEM.02546-20-s0001.pdf]

## **Supplementary information**

### **Title**

Comprehensive analysis of the change in bacterial and chemical components and growth prediction of *Lactobacillus sakei* during *kimoto*-style fermentation starter preparation in *sake* making.

### **Authors**

Masayuki Takahashi, Kana Morikawa, Yasuko Kita, Takamasa Shimoda, Takeshi Akao, Nami Goto-Yamamoto.

### **Affiliation**

National Research Institute of Brewing (NRIB), Higashi-Hiroshima 739-0046, Japan

### **Correspondence**

Masayuki Takahashi, National Research Institute of Brewing (NRIB), 3-7-1 Kagamiyama, Higashi-Hiroshima 739-0046, Japan. Tel.: +81-82-420-0800; Fax: +81-82-420-0802; E-mail: [m.takahashi@nrib.go.jp](mailto:m.takahashi@nrib.go.jp)

### **Journal**

Applied and Environmental Microbiology

**Fig. S1**

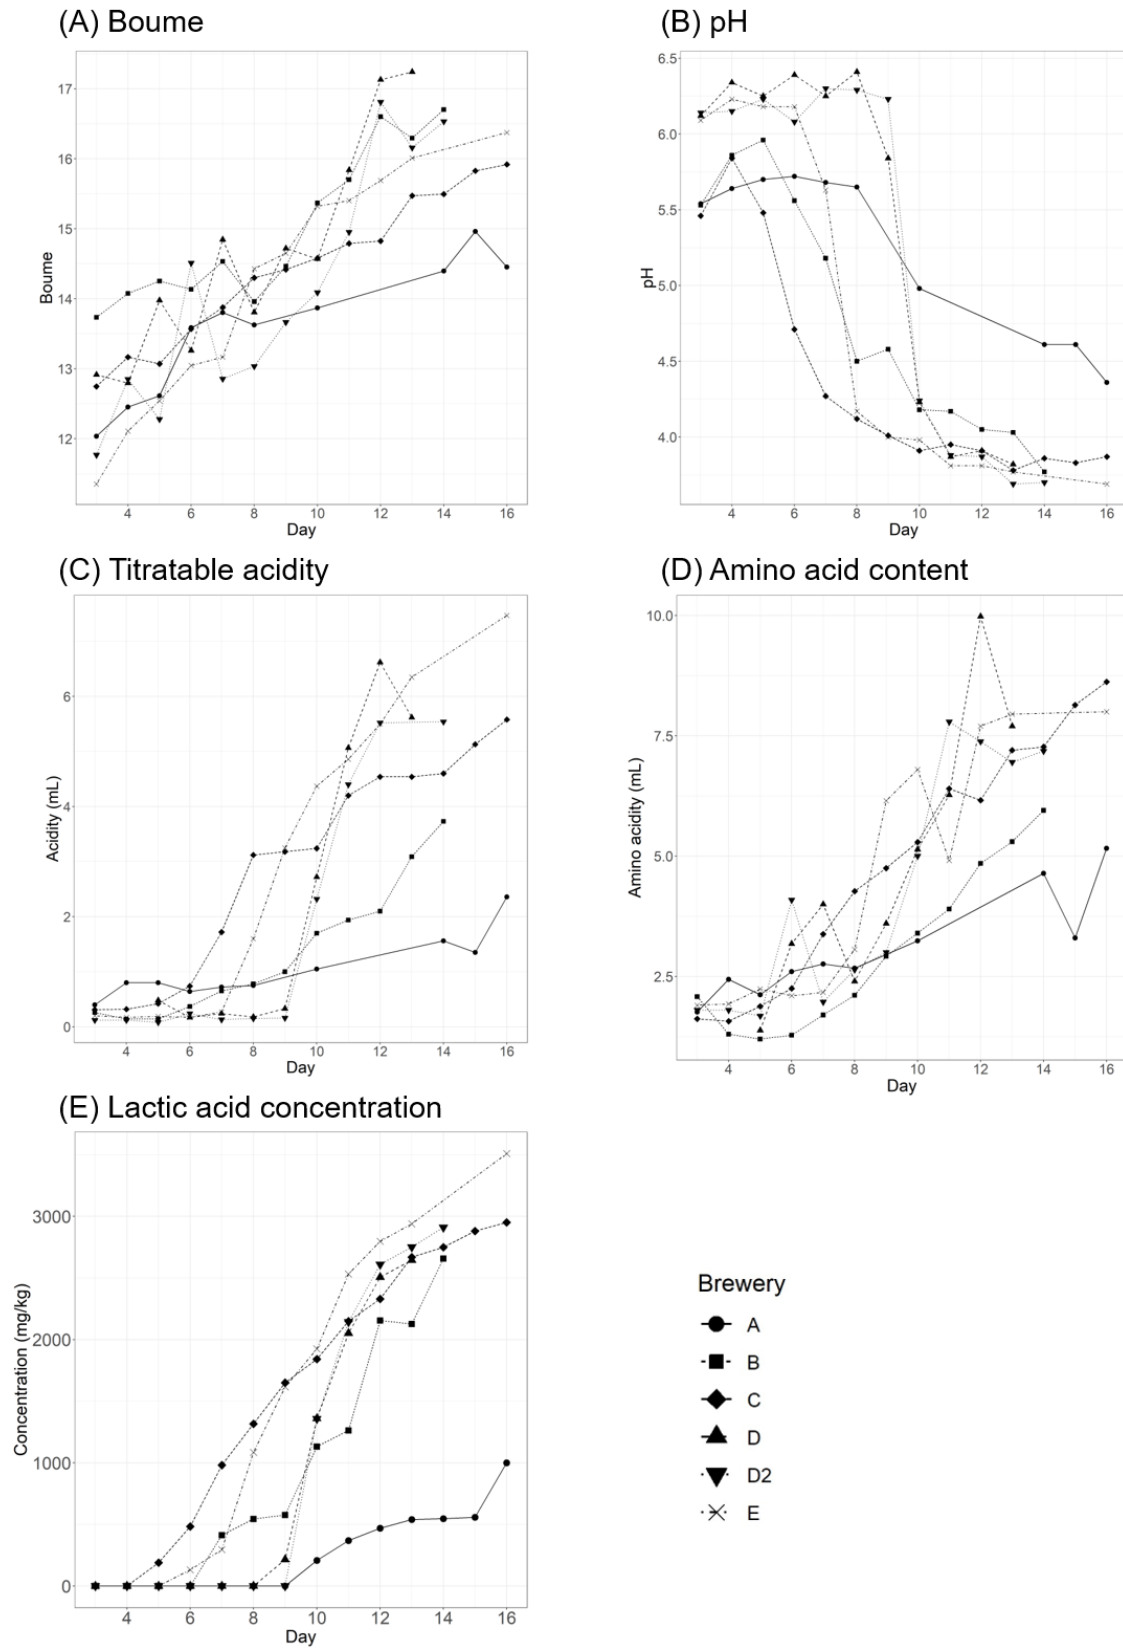

Fig S2.

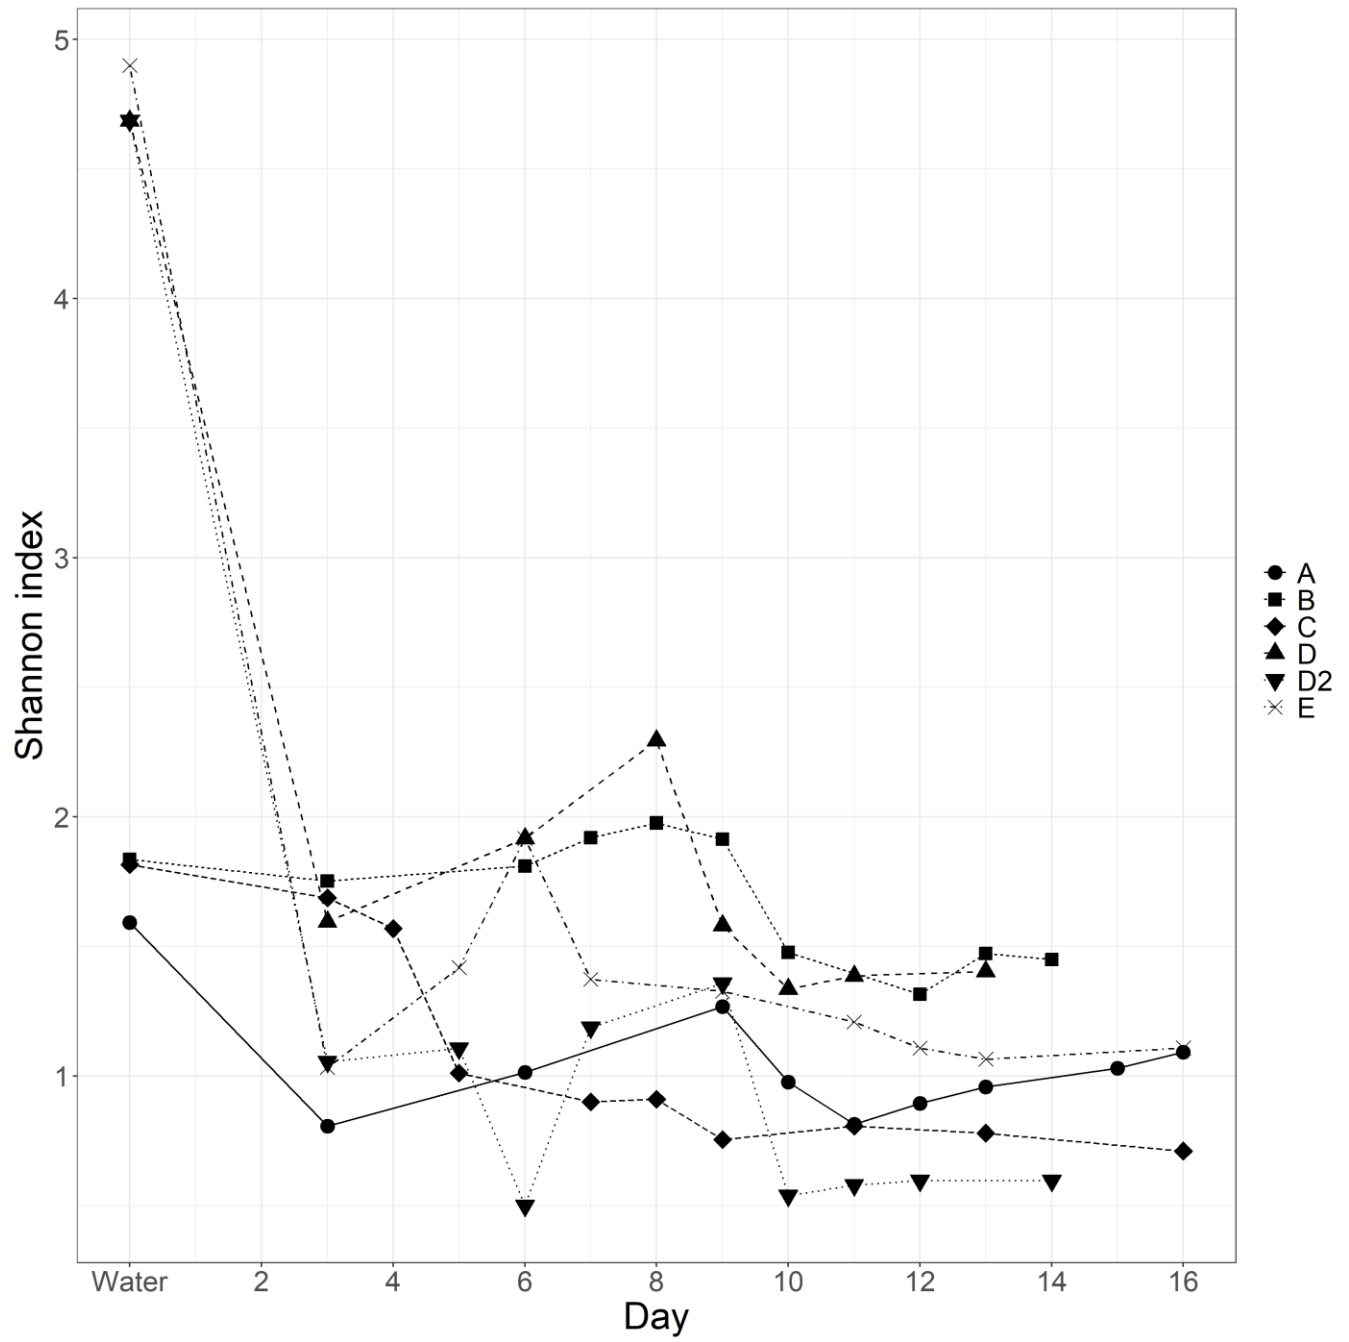

Fig S3.

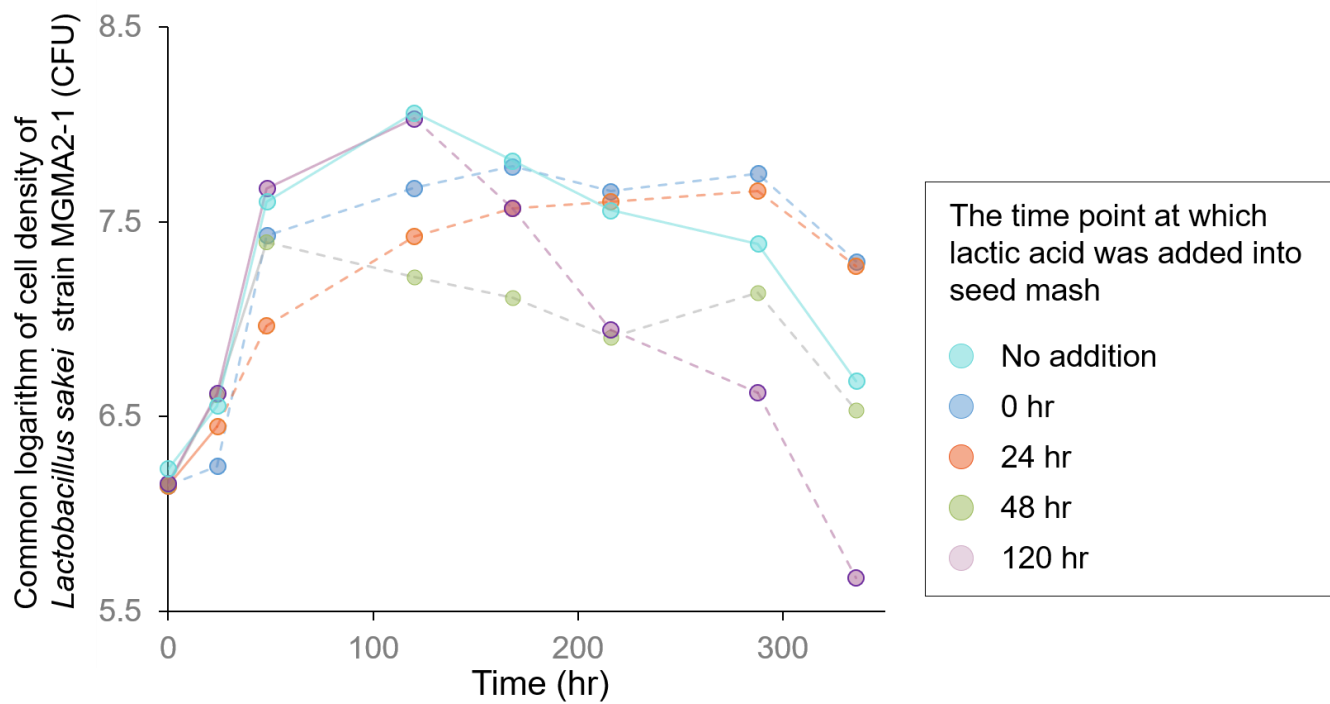

Fig. S4

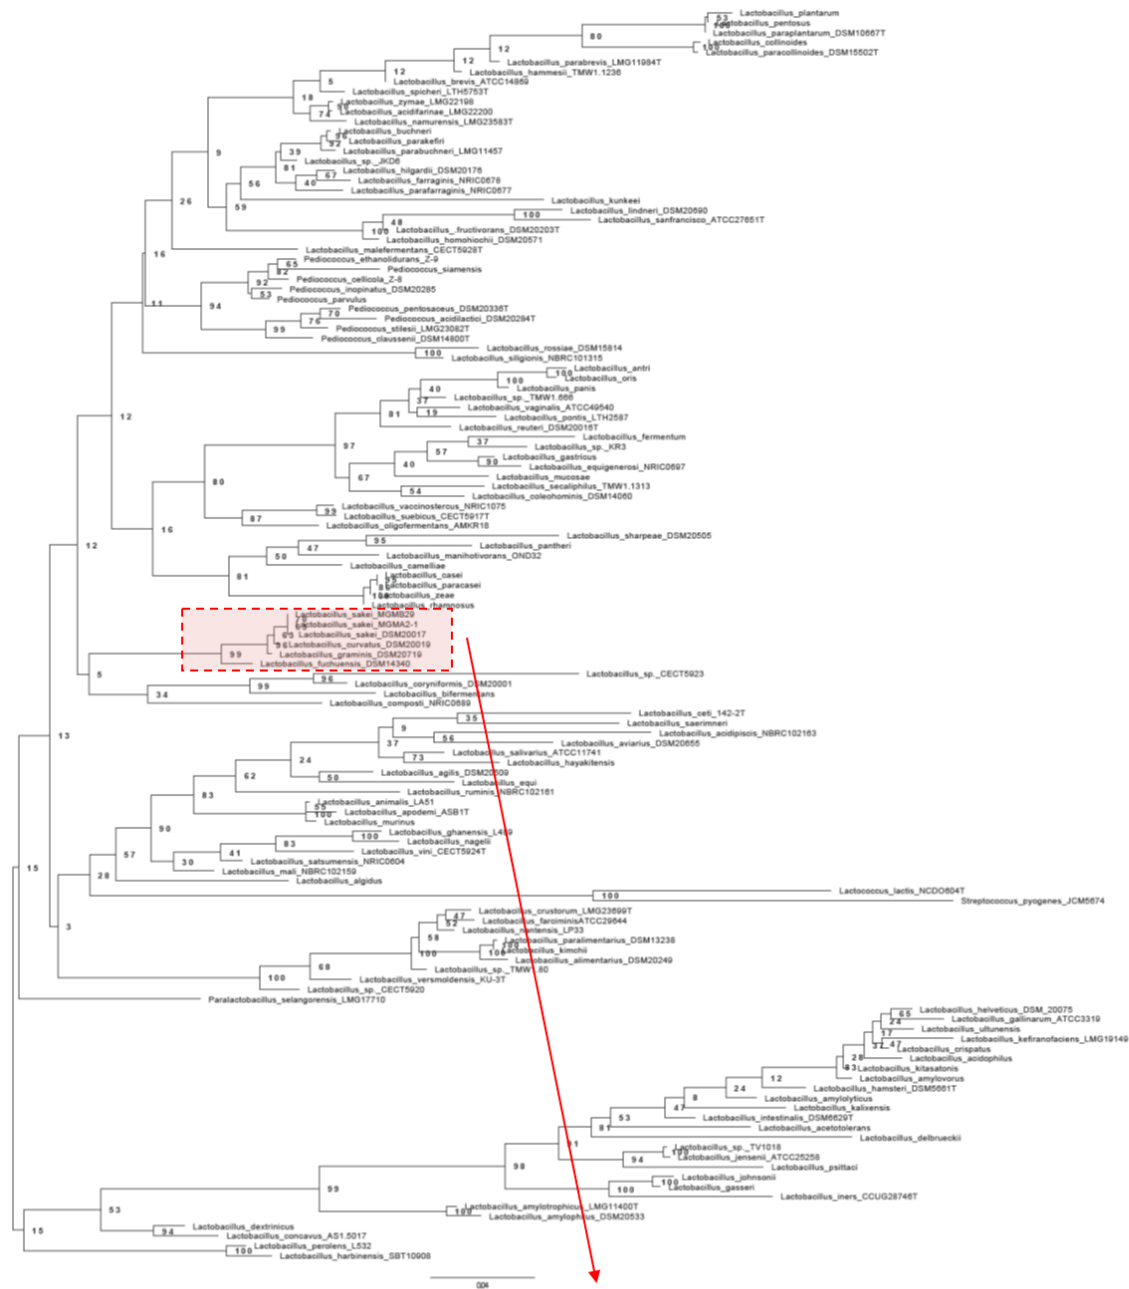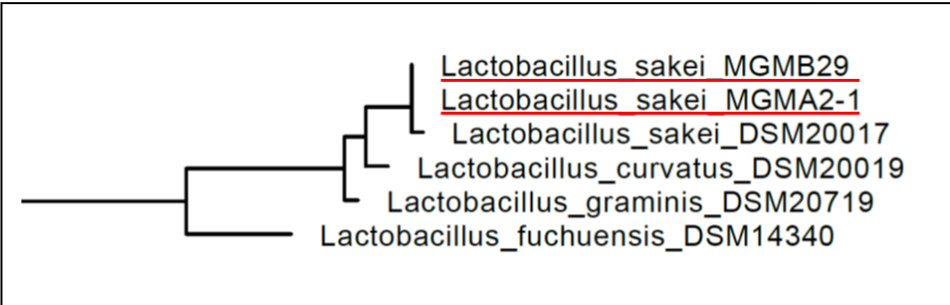

Fig. S5

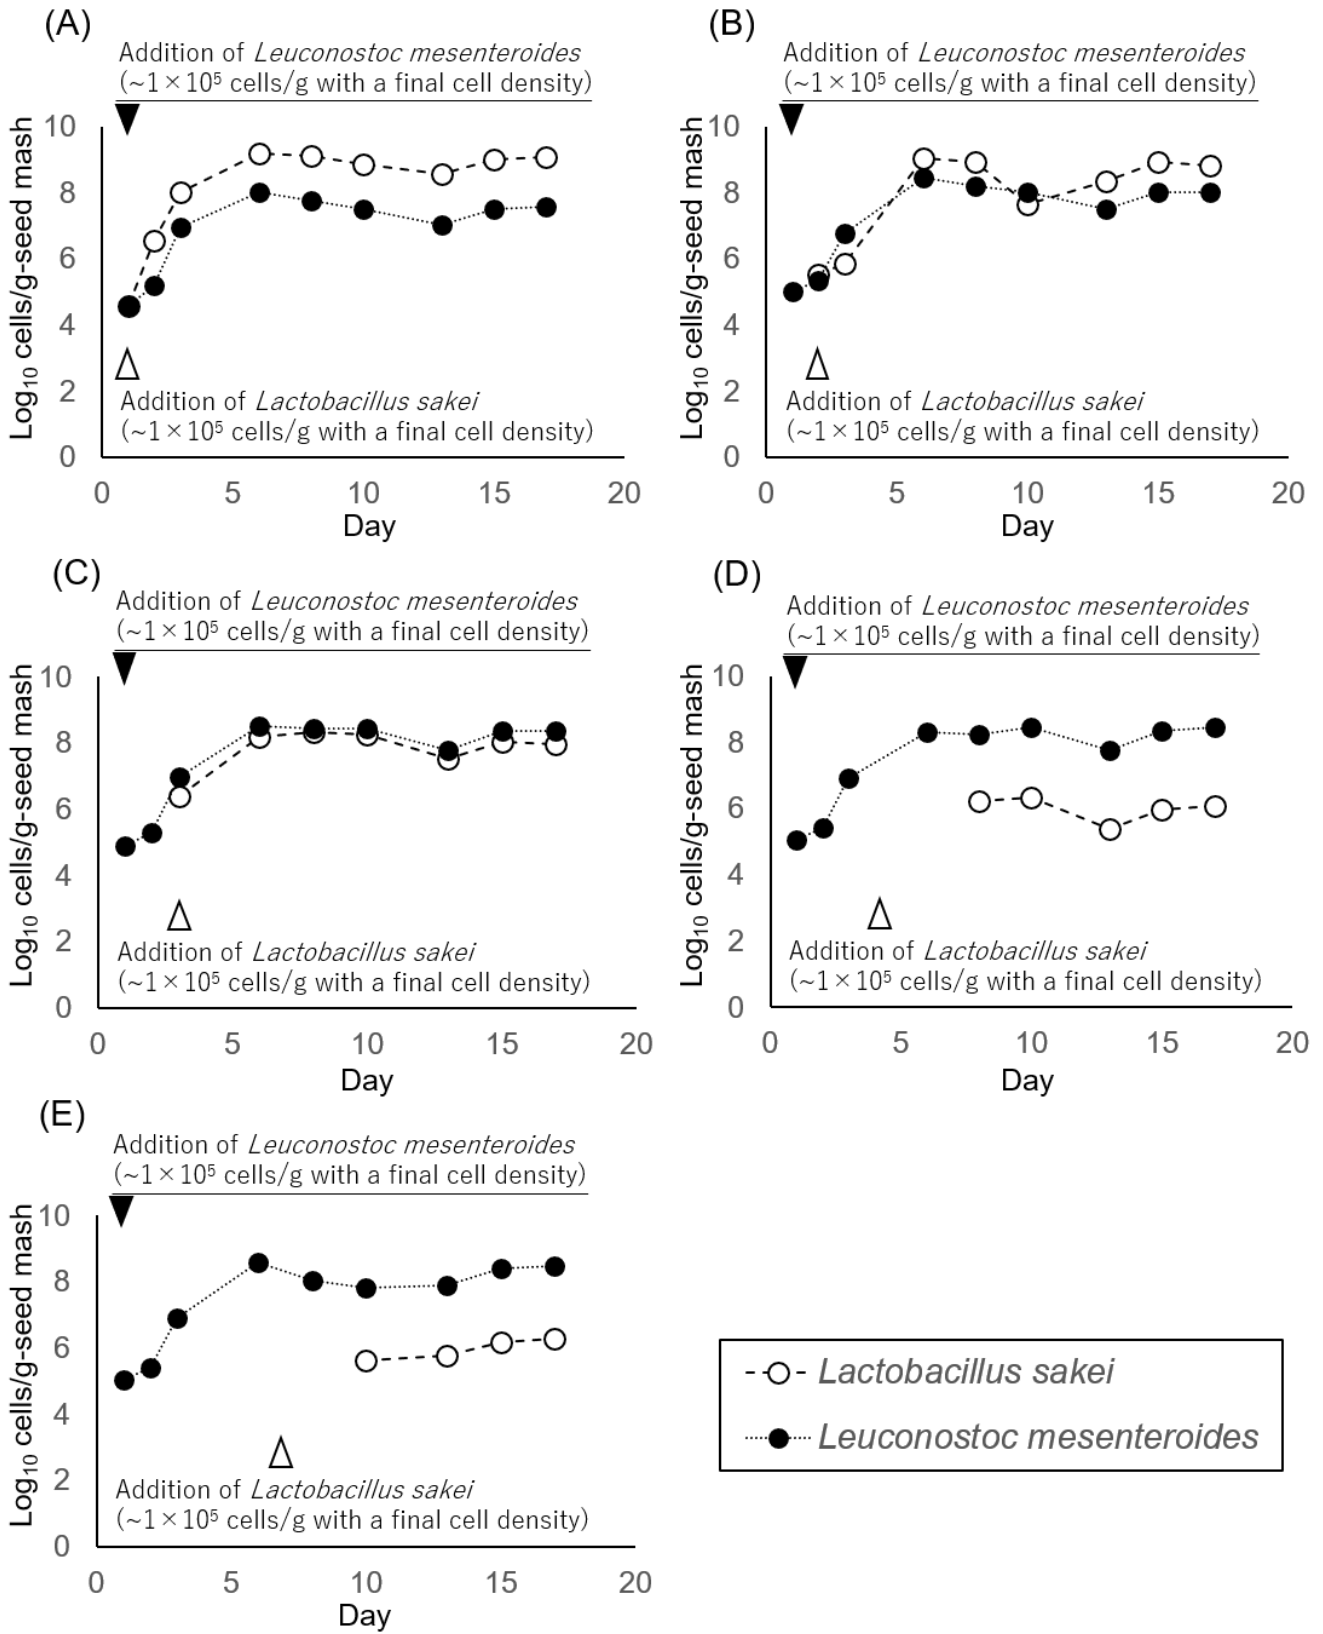

## Figure legends

Fig S1. The changes of Boume (A), pH (B), titratable acidity (C), amino acid content (D), and the concentration of lactic acid (E) during the preparation of seed mash.

Fig S2. The changes in the Shannon index during the preparation of seed mash.

Fig S3. The effect of lactic acid on the growth of *Lactobacillus sakei* strain MGMA2-1 in seed mash. Lactic acid was added to the seed mash at 0 hr, 24 hr, 48 hr, or 120 hr after inoculation (no addition as control). The results before the addition of lactic acid are indicated with solid lines and the results after the addition of lactic acid are indicated with dashed lines. The materials and methods used in this experiment are described in section 6 of the “Additional materials and methods” portion of this supporting information.

Fig S4. Phylogenetic analysis between the strains isolated in this study and the genera *Lactobacillus* and *Pediococcus*. We carried out the multiple alignment of DNA sequence with MAFFT (1), and then, estimated the relationship among species by RAxML (2), and finally, visualized the phylogenetic tree by using Figtree (3).

Fig S5. The difference in the growth of *Lactobacillus sakei* depending on the growth of *Leuconostoc mesenteroides*. (A), Simultaneous inoculation of *L. sakei* and *L. mesenteroides*; (B), Inoculation of *L. sakei* one day after *L. mesenteroides* inoculation; (C), Inoculation of *L. sakei* two days after *L. mesenteroides* inoculation; (D), Inoculation of *L. sakei* three days after *L. mesenteroides* inoculation; (E), Inoculation of *L. sakei* six days after *L. mesenteroides* inoculation. The materials and methods used in this experiment are described in section 7 of the “Additional materials and methods” portion of this supporting information.

**Table S1**

| Brewery | Day   | Raw data<br>(read counts) | Trimmed data<br>(read counts) | Brewery | Day   | Raw data<br>(read counts) | Trimmed data<br>(read counts) |
|---------|-------|---------------------------|-------------------------------|---------|-------|---------------------------|-------------------------------|
| A       | Water | 186684                    | 132093                        | D/D2    | Water | 166177                    | 119633                        |
| A       | 3     | 219916                    | 100853                        | D       | 3     | 262104                    | 111571                        |
| A       | 6     | 399475                    | 182880                        | D       | 6     | 471635                    | 211082                        |
| A       | 9     | 286715                    | 145997                        | D       | 8     | 243076                    | 125834                        |
| A       | 10    | 283768                    | 146351                        | D       | 9     | 340410                    | 187989                        |
| A       | 11    | 219608                    | 112070                        | D       | 10    | 337912                    | 193701                        |
| A       | 12    | 208253                    | 110015                        | D       | 11    | 240036                    | 137172                        |
| A       | 13    | 319282                    | 164446                        | D       | 13    | 384228                    | 211387                        |
| A       | 15    | 296010                    | 154099                        | D2      | 3     | 248942                    | 169504                        |
| A       | 16    | 300352                    | 164201                        | D2      | 5     | 261700                    | 180443                        |
| B       | Water | 182479                    | 129869                        | D2      | 6     | 241564                    | 185738                        |
| B       | 3     | 329809                    | 141009                        | D2      | 7     | 190075                    | 133020                        |
| B       | 6     | 212806                    | 110757                        | D2      | 9     | 203901                    | 136897                        |
| B       | 7     | 277819                    | 138360                        | D2      | 10    | 2614391                   | 2144656                       |
| B       | 8     | 335061                    | 166051                        | D2      | 11    | 183196                    | 136812                        |
| B       | 9     | 364185                    | 187812                        | D2      | 12    | 222330                    | 164419                        |
| B       | 10    | 378420                    | 201999                        | D2      | 14    | 192073                    | 143679                        |
| B       | 12    | 402294                    | 219398                        | E       | Water | 187416                    | 134389                        |
| B       | 13    | 455222                    | 232825                        | E       | 3     | 391011                    | 184801                        |
| B       | 14    | 503726                    | 250195                        | E       | 5     | 419436                    | 203100                        |
| C       | Water | 215074                    | 58667                         | E       | 6     | 360901                    | 172438                        |
| C       | 3     | 332889                    | 87808                         | E       | 7     | 346717                    | 183637                        |
| C       | 4     | 268827                    | 97130                         | E       | 9     | 398518                    | 206283                        |
| C       | 5     | 435131                    | 198500                        | E       | 11    | 349137                    | 177959                        |
| C       | 7     | 377875                    | 192360                        | E       | 12    | 273156                    | 147285                        |
| C       | 8     | 370359                    | 182087                        | E       | 13    | 318846                    | 172865                        |
| C       | 9     | 300165                    | 154732                        | E       | 16    | 310996                    | 164000                        |
| C       | 11    | 155989                    | 81248                         |         |       |                           |                               |
| C       | 13    | 258311                    | 213827                        |         |       |                           |                               |
| C       | 16    | 228955                    | 124239                        |         |       |                           |                               |

\* The sequence after trimming the primer region and removing low-quality sequences and chimera sequences.



**Table S2**

We have provided the data about chemical composition in the Microsoft Excel file (Table S2).

**Table S3**

We have provided the data about microbial community in the Microsoft Excel file (Table S3).

**Formula**

[Log phase]      
$$\Delta C = \sum_{k=1}^n \int \rho_k \cdot N_0 \cdot e^{\ln 2 \cdot t / g_k} dt \quad \dots\dots\dots (1)$$

[Stationary phase]      
$$\Delta C = \sum_{k=1}^n \int \rho_k \cdot N_{max} dt \quad \dots\dots\dots (2)$$

$\Delta C$  : The increase in the amount of lactic acid between sampling points

$\rho_k$  : Lactic acid production rate of bacterium 'k' between sampling points

$g_k$  : Generation time of bacterium 'k' between sampling points

$N_0$  : Initial amount of bacterium 'k'

$N_{max}$  : Maximum amount of bacterium 'k'

## Additional materials and methods.

### 1. Analysis of sugar.

We extracted sugar compound from the seed mash by the method used in previous studies with some modifications (4, 5). First, 2 grams of sample was weighed out into a 50 mL conical polypropylene tube (Corning Inc., Corning, NY), and 30 mL of ultrapure water was added to the conical tube. The conical tube was heated in a microwave for 40–60 sec at 600W until just before boiling, and then vortexed at 1,500 rpm for 10 min. After vortexing, the tube was centrifuged at 3,000 ×g for 15 min. Then, the supernatant was filtered through a paper filter (Advantec No.5A, Advantec Toyo, Tokyo). The sugar remaining on the pellet was extracted twice with ultrapure water, and the water was filtered through the paper filter. The sample solution obtained was diluted to 40 mL, and 0.4 mL of the sample solution was mixed with 0.1 mL of 1,000 mg/L Mannose as an internal standard and 0.5 mL of acetonitrile and placed at 4°C overnight. The sample solution was filtered using a 96-well filter plate (AcroPrep™ 96 Filter Plates, 350 µL well, Product number 5045, Pall Corp., Port Washington, NY) by centrifugation at 1,000 ×g for 10 min. The HPLC conditions are shown below.

|                            |                                                                                                    |
|----------------------------|----------------------------------------------------------------------------------------------------|
| Mobile phase A             | 2mM NaOH, 2mM NaCl solution/Acetonitrile = 10/90                                                   |
| Mobile phase B             | Ultrapure water/Acetonitrile = 90/10                                                               |
| Derivatization reagent     | 20 mM Arginine, 380mM Boric acid, 152 mM KOH (pH9.1)                                               |
| Column                     | HILICpak VG-50 4E, 4.6×250mm, 5µm                                                                  |
| Oven temperature           | 40 °C                                                                                              |
| Derivatization temperature | 150 °C                                                                                             |
| Detector                   | Fluorescence Detector (Excitation: 320 nm, Emission: 430nm)<br>(Waters, 474 Fluorescence Detector) |
| Injection volume           | 5 µL                                                                                               |
| Flow rate                  | 1.0 mL/min (mobile phase), 2.0 mL/min (derivatization reagent)                                     |

| Time (min) | Concentration of mobile phase B (%) |
|------------|-------------------------------------|
| 0.01       | 0                                   |
| 15.00      | 0                                   |
| 40.00      | 25                                  |
| 55.00      | 75                                  |
| 60.00      | 75                                  |

|       |   |
|-------|---|
| 60.01 | 0 |
| 70.00 | 0 |

## 2. Analysis of organic acid.

We extracted organic acid compound from the seed mash by the following method. First, 2 grams of sample was weighed out into a 50 mL conical polypropylene tube, and 8 mL of ultrapure water was added to the conical tube. The conical tube was vortexed at 1,500 rpm for 15 min, and then the tube was centrifuged at 5,000  $\times$ g for 5 min. Then, the supernatant was filtered through a paper filter (Advantec No.5A). The organic acid remaining on the pellet was extracted twice with ultrapure water, and the water was filtered through the paper filter. The sample solution obtained was diluted to 10 mL, and 0.9 mL of the sample solution was mixed with 0.1 mL of 5,000 mg/L isovaleric acid as an internal standard. The sample solution was filtered using a 96-well filter plate (AcroPrep™ 96 Filter Plates, 350  $\mu$ L well, Product number 5045) by centrifugation at 1,000  $\times$ g for 10 min. The HPLC conditions are shown below.

|                  |                                                                                                                                  |
|------------------|----------------------------------------------------------------------------------------------------------------------------------|
| Mobile phase     | 5mM p-Toluenesulfonic Acid (Isocratic elution)                                                                                   |
| Buffer solution  | 5mM p-Toluenesulfonic Acid, 100 $\mu$ M Ethylenediaminetetraacetic acid, 20mM Bis(2-hydroxyethyl)iminotris(hydroxymethyl)methane |
| Column           | SCR-102H $\times$ 1, Shim-Pack SCR-102H 4.6 $\times$ 250mm, 5 $\mu$ m $\times$ 2                                                 |
| Oven temperature | 40 °C                                                                                                                            |
| Detector         | Conductivity Detector (Shimadzu Corp, Kyoto, Japan, CDD-10AVP)                                                                   |
| Injection volume | 10 $\mu$ L                                                                                                                       |
| Flow rate        | 0.8 mL/min (mobile phase), 0.8 mL/min (buffer solution)                                                                          |

## 3. Analysis of nitric acid and nitrous acid.

We extracted nitric acid and nitrous acid from the seed mash by the following method. First, 2.5 grams of sample was weighed out into a 50 mL conical polypropylene tube, and 20 mL of water heated at approx. 80 °C was added to the conical tube. The conical tube was vortexed at 1,500 rpm for 30 sec, and then 5.0 mL of 0.5M NaOH and 5.0 mL of 9% Zinc acetate were added to the tube. The tube was shaken at 80 °C for 15 min, and then the sample was placed on water for cooling. The sample was centrifuged at 3,000  $\times$ g for 15 min, and

the supernatant was filtered through a paper filter (Advantec No.5A). The nitric acid and nitrous acid remaining on the pellet were extracted twice with ultrapure water, and the water was filtered through the paper filter. The sample solution obtained was diluted to 50 mL with ultrapure water. The sample solution was filtered using a 96-well filter plate (AcroPrep™ 96 Filter Plates, 350 µL well, Product number 5045) by centrifugation at 1,000 ×g for 10 min and analyzed by HPLC under the following conditions.

|                  |                                                                                                                |
|------------------|----------------------------------------------------------------------------------------------------------------|
| Mobile phase     | 5mM Sodium Dihydrogenphosphate, 5mM Disodium Hydrogenphosphate<br>100mM Sodium Perchlorate (Isocratic elution) |
| Column           | Asahipak NH2P-50 4E, 4.6×250mm, 5µm                                                                            |
| Oven temperature | 30 °C                                                                                                          |
| Detector         | UV-VIS (Shimadzu Corp., SPD-10AVP)                                                                             |
| Injection volume | 20 µL                                                                                                          |
| Flow rate        | 0.8 mL/min                                                                                                     |

#### 4. Analysis of amino acid.

We extracted amino acid from the seed mash by the following method. First, 2 grams of sample was weighed out into a 50 mL conical polypropylene tube, and 18 mL of 10% 5-Sulfosalicylic Acid solution was added to the conical tube. The conical tube was vortexed at 1,500 rpm for 5 min, and then 11.1 mL of 1M NaOH was added to the tube. The tube was centrifuged at 3,000 ×g for 15 min, and the supernatant was filtered through a paper filter (Advantec No.5A). The amino acid remaining on the pellet was extracted twice by 100 mM citric acid solution (pH 2.2), and the citric acid buffer solution was filtered through the paper filter. The sample solution obtained was diluted to 40 mL with citric acid solution. The sample solution was filtered using a 96-well filter plate (AcroPrep™ 96 Filter Plates, 350 µL well, Product number 5045) by centrifugation at 1,000 ×g for 10 min and derivatized using the AccQ-Tag Ultra Derivatization Kit (Waters Corp., Milford, MA) according to the manufacturer's instructions after the addition of norvaline as an internal standard (final concentration 50 µM). The UHPLC conditions are shown below.

|                |                                    |
|----------------|------------------------------------|
| Mobile phase A | AccQ Tag Ultra Eluent A            |
| Mobile phase B | AccQ Tag Ultra Eluent B            |
| Column         | AccQ-Tag Ultra, 2.1×100 mm, 1.7 µm |

|                  |                                                |
|------------------|------------------------------------------------|
| Oven temperature | 60 °C                                          |
| Detector         | Mass spectrometer (Waters, Quattro Premier XE) |
| Injection volume | 5 µL                                           |
| Flow rate        | 0.7 mL/min                                     |

| Time (min) | Concentration of mobile phase B (%) |
|------------|-------------------------------------|
| Initial    | 0.1                                 |
| 0.54       | 0.1                                 |
| 5.74       | 9.1                                 |
| 7.74       | 21.2                                |
| 8.04       | 59.6                                |
| 8.05       | 90.0                                |
| 8.64       | 90.0                                |
| 8.73       | 0.1                                 |
| 10.0       | 0.1                                 |

## 5. Analysis of amine.

We extracted amine from the seed mash by the following method. First, 2.5 grams of sample was weighed out into a 50 mL conical polypropylene tube, and 5 mL of 20% trichloroacetic acid solution and 20 mL of ultrapure water were added to the conical tube. The conical tube was vortexed at 1,500 rpm for 5 min, and then the tube was centrifuged at 3,000 ×g for 15 min. The supernatant was filtered through a paper filter (Advantec No.5A). The amine remaining on the pellet was extracted twice by 4% trichloroacetic acid solution, and the solution was filtered through the paper filter. The sample solution obtained was diluted to 50 mL with 4% trichloroacetic acid solution. The sample solution was filtered using a 96-well filter plate (AcroPrep™ 96 Filter Plates, 350 µL well, Product number 5045) by centrifugation at 1,000 ×g for 10 min, and 9 µL of the sample was derivatized using the AccQ-Tag Ultra Derivatization Kit (Waters Corp.) according to the manufacturer's instructions after the addition of heptylamine as an internal standard (final concentration 40 µM). The UHPLC conditions are shown below.

|                |                         |
|----------------|-------------------------|
| Mobile phase A | AccQ Tag Ultra Eluent A |
| Mobile phase B | AccQ Tag Ultra Eluent B |

|                  |                                                |
|------------------|------------------------------------------------|
| Column           | UPLC BEH C18, 2.1×100 mm, 1.7 μm               |
| Oven temperature | 55 °C                                          |
| Detector         | Mass spectrometer (Waters, Quattro Premier XE) |
| Injection volume | 2 μL                                           |
| Flow rate        | 0.5 mL/min                                     |

| Time (min) | Concentration of mobile phase B (%) |
|------------|-------------------------------------|
| Initial    | 1.0                                 |
| 0.54       | 1.0                                 |
| 2.54       | 5.0                                 |
| 3.54       | 15.0                                |
| 4.54       | 30.0                                |
| 7.05       | 90.0                                |
| 7.65       | 90.0                                |
| 7.75       | 1.0                                 |
| 8.70       | 1.0                                 |

#### **6. Effect of lactic acid on the growth of *Lactobacillus sakei* during seed mash preparation.**

We prepared seed mash by using 10 g of sterilized pregelatinized rice and 16.6 mL of autoclaved pH 6.4-adjusted *koji* medium in order to remove the influence of degradation of the rice by *koji* enzymes on the nutrition of the seed mash. The ingredients were mixed in a 50 mL conical polypropylene tube. We inoculated *L. sakei* strain MGMA2-1 into the seed mash. A volume of 266 μL of 10% lactic acid solution was added to the seed mash at 0 hr, 24 hr, 48 hr, or 120 hr after inoculation (no addition as control). We determined the colony-forming units (cfu) of *L. sakei* by the spiral plating method.

#### **7. Co-culture condition of *L. sakei* and *Leuconostoc mesenteroides* during seed mash preparation.**

We prepared seed mash by using 10 g of sterilized pregelatinized rice and 16.6 mL of autoclaved pH 6.4-adjusted *koji* medium in order to remove the influence of degradation of the rice by *koji* enzymes on the nutrition of the seed mash. The ingredients were mixed in a 50 mL conical polypropylene tube. *L.*

*mesenteroides* NBRC100496 was purchased from National Institute of Technology and Evaluation, Japan. *L. mesenteroides* NBRC100496 was inoculated at the start time of the culture, and *L. sakei* MGMA2-1 was inoculated into the seed mash simultaneously with the *L. mesenteroides* inoculation, or one, two, three, or six days after the *L. mesenteroides* inoculation. The seed mash was placed at 10°C in an incubator for 17 days and sampled on day 1, day 2, day 3, day 6, day 8, day 10, day 13, day 15, and day 17 (day 1 refers to the day the culture was started). Genomic DNA of *L. sakei* or *L. mesenteroides* in the sample collected was extracted from the samples in the same way used in next-generation sequencing analysis and determined by qPCR analysis using a primer set as follows: For the quantification of *L. sakei*, CTCCAAGTCATTAAGTTTACTCAC (forward primer), CATCCGTTGAACCTAACCTTCTTG (reverse primer); for the quantification of *L. mesenteroides*, GAAGTACGTGATACATCATTACGTG (forward primer), CACGAACCATCATGTTGACACCTGG (reverse primer). The PCR was carried out in a total volume of 10 µL using a KAPA SYBR Fast qPCR Kit (Kapa Biosystems, Wilmington, MA) containing 0.2 µM of each primer. The thermal cycler program of the PCR was 95°C for 3 min, 45 cycles at 95°C for 10 sec, 61°C (*L. sakei*) or 65°C (*L. mesenteroides*) for 30 sec, and 72°C for 30 sec using the LightCycler® 96 System (Roche Diagnostics, Switzerland).



## References

1. Katoh K, Misawa K, Kuma KI, Miyata T. 2002. MAFFT: a novel method for rapid multiple sequence alignment based on fast Fourier transform. *Nucleic Acids Res* 30(14):3059–3066.
2. Stamatakis A. 2014. RAxML version 8: a tool for phylogenetic analysis and post-analysis of large phylogenies. *Bioinformatics* 30(9):1312–1313.
3. Rambaut A. 2017. FigTree-version 1.4.3, a graphical viewer of phylogenetic trees. Computer program distributed by the author, website: <http://tree.bio.ed.ac.uk/software/figtree>
4. Sato K, Horie H, Kitajima N. 2009. Analysis of sugar composition in strawberry using capillary electrophoresis. *Bull Fukuoka Agric Res Cent* 28:56–60 (In Japanese).
5. Mikami H, Ishida Y. 1983. Post-column fluorometric detection of reducing sugars in high performance liquid chromatography using arginine. *Bunseki Kagaku* 32(6):E207–210.
